# Supplementary material
Source: publisher figshare collection journal article supplement (https://karger.figshare.com/ndownloader/files/30725921)
Supplement: Supplementary file 1 [file 30725921]

**Supplementary Information**

Table 1S. Primer sequences and amplicon sizes for real-time PCR

| **Primer** | **Sequence** | **Amplicon**  **(bp)** |
| --- | --- | --- |
| DAX1 2F  DAX1 2R | 5’ACTCCAGTGGGGAACTCAGCAAATACTC 3’  5’GGCCTGAAGAACAGTTCAGCAATGAC 3’ | 147 |
| MAGEB1 3F  MAGEB1 3R | 5’GTCATGTACCGAATCTGACGAAGGTG 3’  5’CCTCCCAGGCTACAGGATCTTTGAC 3’ | 113 |
| MAGEB2 2F  MAGEB2 2R | 5’AGAGGAGCACTCAGTCTTTGGGGAAC 3’  5’TCTTGCTGGTTTCAGCATAGGCTCTC 3’ | 152 |
| MAGEB3 5F  MAGEB3 5R | 5’ACAAGTGCCCAACAGTAATCCTGCAC 3’  5’GCTGCAGCTTGGACTCTTTCTTCCTC 3’ | 183 |
| MAGEB4 1F  MAGEB4 1R | 5’GACGAAGATGTTAGTGCAGTTCCTGCTG 3’  5’GATGTAGGAGTGAGTGGTGGGGTTGAC 3’ | 196 |
| NPC1 8F  NPC1 8R | 5’ACCCTGGCTGTGTCATTTTCTTCTCG 3’  5’TGACCAGAGGTCAACTGGATTGGTTG 3’ | 101 |
